# Supplementary material for: Evaluation of ((La0.60Sr0.40)0.95Co0.20Fe0.80O3-x)-Ag Composite Anode for Direct Ammonia Solid Oxide Fuel Cells and Effect of Pd Impregnation on the Electrochemical Performance
Source: Preprints.org preprint supplement (doi:10.20944/preprints202103.0199.v1), 2021-03-05
Supplement: Supplementary file 1 [file supplementary]

**Supplementary Information for**

**Evaluation of ((La0.60Sr0.40)0.95Co0.20Fe0.80O3-x)-Ag composite anode for direct ammonia solid oxide fuel cells and effect of Pd impregnation on the electrochemical performance**

Shambhu Singh Rathorea, Aniruddha P. Kulkarnia*, Daniel Finia, Sarbjit Giddeya, Aaron Seeberb

a: CSIRO Energy, Private Bag 10, Clayton South 3169, Victoria, Australia|
b: CSIRO Manufacturing, Private Bag 31, Clayton South 3169, Victoria, Australia

*Corresponding author email: [Aniruddha.Kulkarni@csiro.au](mailto:Aniruddha.Kulkarni@csiro.au)

**Supporting Figure**

| **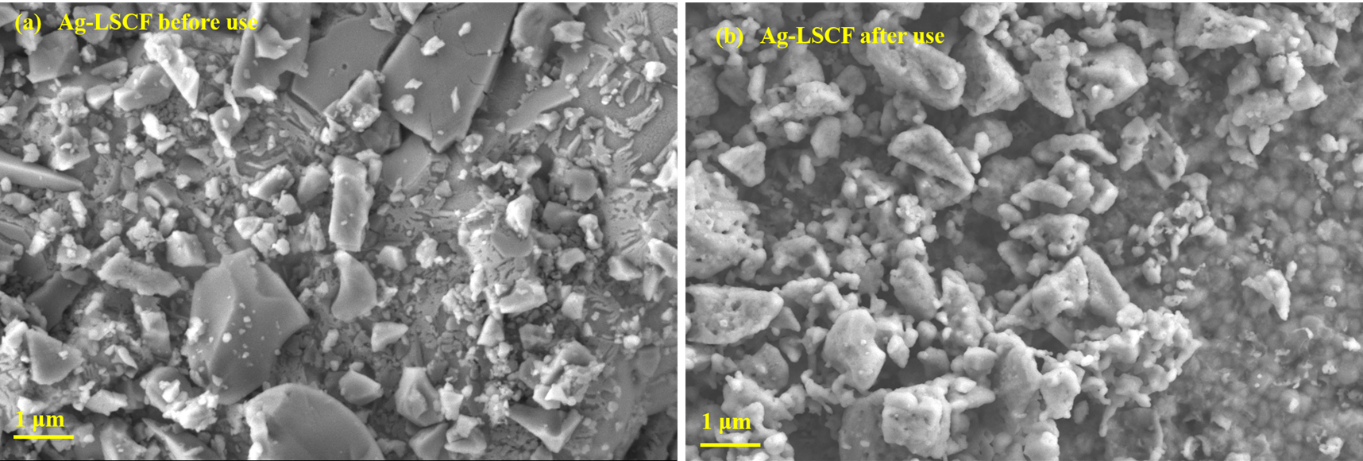** |
| --- |
| Figure S1. SEM image of Ag-LSCF anode surface as prepared (a) and after cell operation (b). |
